# Supplementary material
Source: publisher figshare collection journal article supplement (https://asha.figshare.com/articles/dataset/_/26790580)
Supplement: Supplementary file 1 [file 1]

**Supplemental Material S2.** Descriptive statistics for all language tests.

|                                           |                                      | Total sample |               |              |                    | FH-        |               |              |                    | FH+       |               |              |                    |
|-------------------------------------------|--------------------------------------|--------------|---------------|--------------|--------------------|------------|---------------|--------------|--------------------|-----------|---------------|--------------|--------------------|
|                                           |                                      | N            | M             | SD           | Range              | N          | M             | SD           | Range              | N         | M             | SD           | Range              |
| <b>Expressive vocabulary 24 months</b>    | <b>Raw</b>                           | <b>185</b>   | <b>139.78</b> | <b>86.92</b> | <b>4, 302</b>      | <b>121</b> | <b>153.93</b> | <b>86.01</b> | <b>10, 302</b>     | <b>64</b> | <b>113.03</b> | <b>82.85</b> | <b>4, 285</b>      |
|                                           | Percentile                           | 185          | 40.01         | 23.38        | 5, 90              | 121        | 43.73         | 23.10        | 5, 90              | 64        | 32.97         | 22.44        | 5, 80              |
| <b>Expressive vocabulary 36 months</b>    | <b>Raw</b>                           | <b>142</b>   | <b>271.42</b> | <b>54.71</b> | <b>37, 314</b>     | <b>91</b>  | <b>282.10</b> | <b>37.14</b> | <b>100, 314</b>    | <b>51</b> | <b>252.37</b> | <b>73.34</b> | <b>37, 314</b>     |
|                                           | Percentile                           | 142          | 63.20         | 21.26        | 5, 90              | 91         | 66.98         | 18.22        | 20, 90             | 51        | 56.47         | 24.58        | 5, 90              |
| <b>Naming 36 months</b>                   | Raw score (max 65)                   | 126          | 46.97         | 7.62         | 21, 62             | 79         | 48.00         | 6.77         | 22, 62             | 47        | 45.23         | 8.66         | 21, 58             |
|                                           | Percentage correct                   | 126          | 72.83         | 11.26        | 33.8, 95.4         | 79         | 74.21         | 10.48        | 33.8, 95.4         | 47        | 70.51         | 12.23        | 35.4, 89.2         |
|                                           | <b>Z-score</b>                       | <b>126</b>   | <b>-0.16</b>  | <b>1.06</b>  | <b>-3.8, 2.0</b>   | <b>79</b>  | <b>-0.03</b>  | <b>0.99</b>  | <b>-3.8, 2.0</b>   | <b>47</b> | <b>-0.38</b>  | <b>1.16</b>  | <b>-3.7, 1.4</b>   |
| <b>Lexical comprehension 36 months</b>    | Raw score (max 18)                   | 124          | 12.82         | 2.18         | 6, 17              | 77         | 12.83         | 2.02         | 8, 16              | 47        | 12.81         | 2.45         | 6, 17              |
|                                           | Percentage correct                   | 124          | 71.24         | 12.13        | 33.3, 94.4         | 77         | 71.28         | 11.20        | 44.4, 88.9         | 47        | 71.16         | 13.64        | 33.3, 94.4         |
|                                           | <b>z-score</b>                       | <b>124</b>   | <b>-0.04</b>  | <b>1.06</b>  | <b>-3.4, 2.0</b>   | <b>77</b>  | <b>-0.04</b>  | <b>0.98</b>  | <b>-2.4, 1.5</b>   | <b>47</b> | <b>-0.04</b>  | <b>1.19</b>  | <b>-3.4, 2.0</b>   |
| <b>Phonological processing 36 months</b>  | Raw score (max 12)                   | 120          | 10.22         | 1.85         | 4, 12              | 75         | 10.65         | 1.53         | 6, 12              | 45        | 9.49          | 2.11         | 4, 12              |
|                                           | <b>Percentage correct</b>            | <b>120</b>   | <b>85.14</b>  | <b>15.40</b> | <b>33.3, 100.0</b> | <b>75</b>  | <b>88.78</b>  | <b>12.74</b> | <b>50.0, 100.0</b> | <b>45</b> | <b>79.07</b>  | <b>17.55</b> | <b>33.3, 100.0</b> |
| <b>Speech-sound development 36 months</b> | <b>Percentage correct consonants</b> | <b>119</b>   | <b>75.64</b>  | <b>18.10</b> | <b>24.6, 100.0</b> | <b>75</b>  | <b>79.71</b>  | <b>15.57</b> | <b>29.7, 100.0</b> | <b>44</b> | <b>68.70</b>  | <b>20.08</b> | <b>24.6, 94.8</b>  |

Note. Scores entered in the analyses are indicated in bold.
