# Supplementary material
Source: publisher figshare collection journal article supplement (https://asha.figshare.com/articles/dataset/_/26790580)
Supplement: Supplementary file 2 [file 1]

**Supplemental Material S3.** SES effects on the main analyses.

**Table S3.** Summary of the ANOVA results including SES as covariate.

| Dependent variable                       | Fix factors and covariates | F (df)                 | p-value         |             |
|------------------------------------------|----------------------------|------------------------|-----------------|-------------|
| Expressive vocabulary<br>24 months       | SES                        | 0.061 (1,181)          | .805            | .000        |
|                                          | FH                         | <b>9.336 (1,181)</b>   | <b>.003</b>     | <b>.050</b> |
| Expressive vocabulary<br>36 months       | SES                        | 3.564 (1, 141)         | .061            | .025        |
|                                          | FH                         | <b>12.146 (1, 141)</b> | <b>&lt;.001</b> | <b>.081</b> |
|                                          | LT                         | <b>48.089 (1, 141)</b> | <b>&lt;.001</b> | <b>.260</b> |
|                                          | FH * LT                    | <b>8.463 (1, 141)</b>  | <b>.004</b>     | <b>.058</b> |
| Naming<br>36 months                      | SES                        | 1.959 (1, 125)         | .164            | .016        |
|                                          | FH                         | 1.397 (1, 125)         | .240            | .011        |
|                                          | LT                         | <b>24.983 (1, 125)</b> | <b>&lt;.001</b> | <b>.171</b> |
|                                          | FH * LT                    | .761 (1, 125)          | .385            | .006        |
| Lexical comprehension<br>36 months       | SES                        | 2.574 (1, 123)         | .111            | .021        |
|                                          | FH                         | 0.410 (1, 123)         | .523            | .003        |
|                                          | LT                         | 2.741 (1, 123)         | .100            | .023        |
|                                          | FH * LT                    | 0.076 (1, 123)         | .783            | .001        |
| Phonological<br>processing<br>36 months  | SES                        | 1.512 (1, 119)         | .221            | .013        |
|                                          | FH                         | <b>16.725 (1, 119)</b> | <b>&lt;.001</b> | <b>.127</b> |
|                                          | LT                         | <b>4.575 (1, 119)</b>  | <b>.035</b>     | <b>.038</b> |
|                                          | FH * LT                    | <b>9.880 (1, 119)</b>  | <b>.002</b>     | <b>.079</b> |
| Speech-sound<br>development<br>36 months | SES                        | 0.497 (1, 118)         | .482            | .004        |
|                                          | FH                         | <b>6.128 (1, 118)</b>  | <b>.015</b>     | <b>.051</b> |
|                                          | LT                         | <b>24.354 (1, 118)</b> | <b>&lt;.001</b> | <b>.176</b> |
|                                          | FH * LT                    | .690 (1, 118)          | .408            | .006        |

*Note.* Significant results are reported in bold.

**Figure S3.** Path analysis model including the paths SES → FH and SES → Expressive vocabulary 24 m.

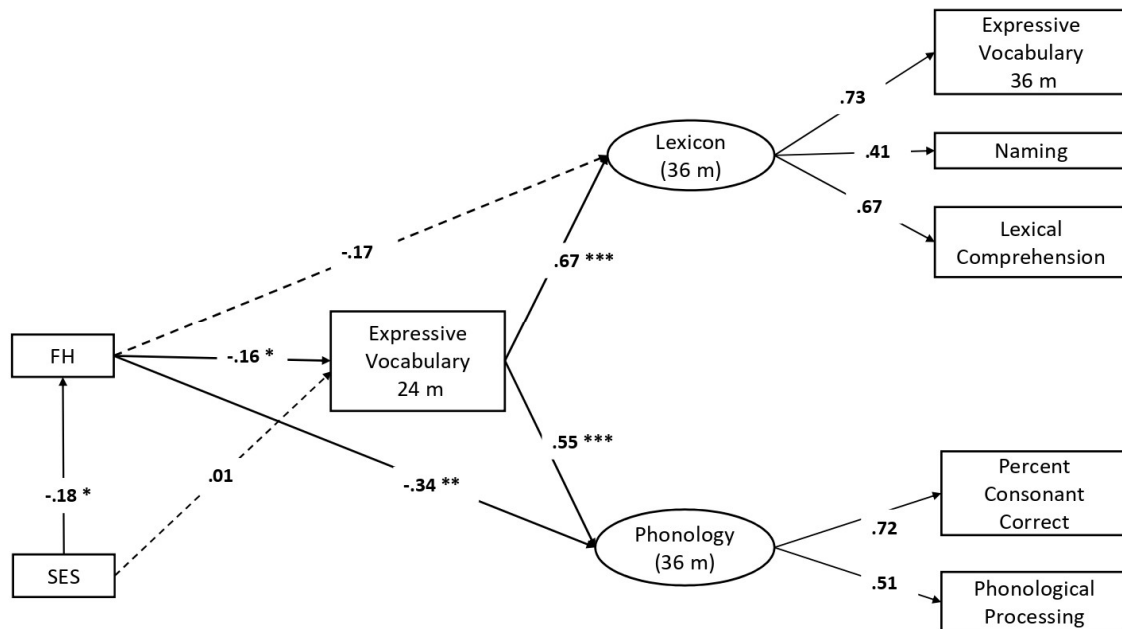

The Figure shows standardised estimates of coefficients. Model fit information: Chi-square = 24.80,  $df = 15$ ,  $p = .053$ ; Root mean square error of approximation (RMSEA) = .067, 90% CI = .000-.113; comparative fit-index (CFI) = .952; Standardised Root Mean Square Residuals (SRMR) = .066. Nonsignificant paths are indicated by a dotted line. \*  $p < .05$ ; \*\*  $p < .01$ ; \*\*\*  $p < .001$
