# Supplementary material
Source: publisher figshare collection journal article supplement (https://asha.figshare.com/articles/dataset/_/26790580)
Supplement: Supplementary file 3 [file 1]

**Supplemental Material S1.** Phonological processing task items list and example trial presentation.

**Table S1.** Items list for the phonological processing task.

| Tria<br>I | Target                                       | Distractor 1                         | Distractor 2                          |
|-----------|----------------------------------------------|--------------------------------------|---------------------------------------|
| 1         | <i>/ˈluna/ luna</i> (moon)                   | <i>/ˈlana/ lana</i> (wool)           | <i>/ˈlupa/ lupa</i> (wolf)            |
| 2         | <i>/ˈporta/ porta</i> (door)                 | <i>/ˈposta/ posta</i> (mail)         | <i>/ˈtorta/ torta</i> (cake)          |
| 3         | <i>/ˈbrattʃo/ braccio</i> (arm)              | <i>/ˈlattʃo/ laccio</i> (shoe-lace)  | <i>/ˈgʃattʃo/ ghiaccio</i> (ice)      |
| 4         | <i>/pomˈpjere/ pompiere</i><br>(firefighter) | <i>/porˈtjere/ portiere</i> (porter) | <i>/paˈnjere/ paniere</i><br>(basket) |
| 5         | <i>/ˈnave/ nave</i> (ship)                   | <i>/ˈneve/ neve</i> (snow)           | <i>/ˈnane/ nane</i> (dwarfs)          |
| 6         | <i>/maˈlata/ malata</i> (sick)               | <i>/paˈtata/ patata</i> (potato)     | <i>/maˈtita/ matita</i> (pencil)      |
| 7         | <i>/ˈtaska/ tasca</i> (pocket)               | <i>/ˈvaska/ vasca</i> (bathtub)      | <i>/ˈpeska/ pesca</i> (peach)         |
| 8         | <i>/ˈtoro/ toro</i> (bull)                   | <i>/ˈkoro/ coro</i> (chorus)         | <i>/ˈtopo/ topo</i> (mouse)           |
| 9         | <i>/kamˈmello/ cammello</i><br>(camel)       | <i>/kasˈtello/ castello</i> (castle) | <i>/kapˈpello/ cappello</i> (hat)     |
| 10        | <i>/ˈkane/ cane</i> (dog)                    | <i>/ˈkaze/ case</i> (houses)         | <i>/ˈpane/ pane</i> (bread)           |
| 11        | <i>/maʎˈlone/ maglione</i><br>(sweater)      | <i>/saˈpone/ sapone</i> (soap)       | <i>/palˈlone/ pallone</i> (ball)      |
| 12        | <i>/ˈʃesta/ cesta</i> (basket)               | <i>/ˈfesta/ festa</i> (party)        | <i>/ˈtɛsta/ testa</i> (head)          |

*Note.* For each item: /IPA transcription/; **Italian orthography**; English translation

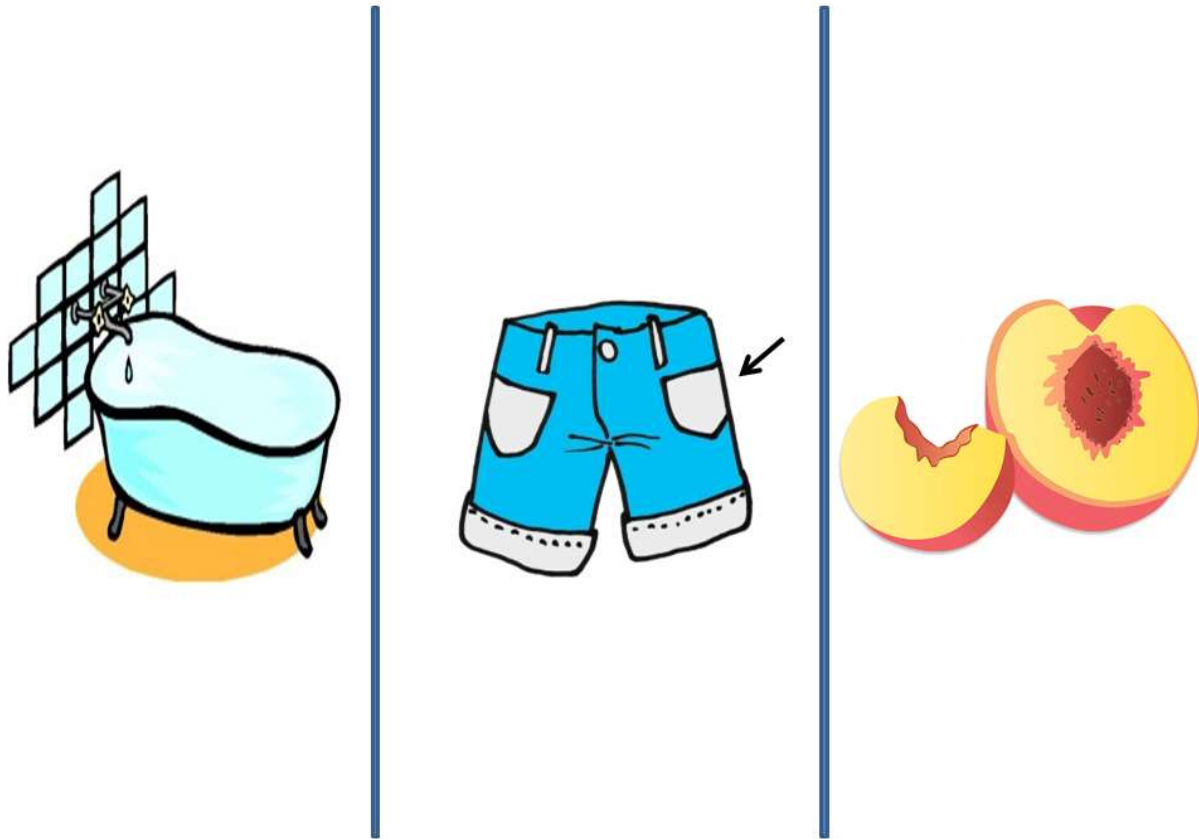

**Fig S1.** Example of a trial presentation for the phonological processing task - Trial 7: Target  
*/ˈtaska/ tasca* (pocket).
